# Supplementary material
Source: publisher figshare collection journal article supplement (https://future-science-group.figshare.com/ndownloader/files/15659522)
Supplement: Supplementary file 1 [file 15659522]

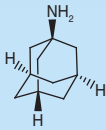

Amantadine

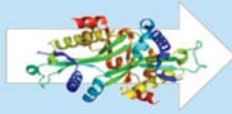

Spermidine/spermine N1-acetyltransferase (SSAT-1)

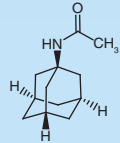

Acetylated amantadine (AA)

*Administered in capsule*

*Metabolized in the body*

*Secreted in the urine*

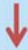

*Quantitative measurement of AA by LC-MS gold standard*

Sample collection

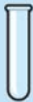

Urine/  
biological  
sample

Sample separation

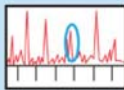

Gas  
chromatography

Molecular identification

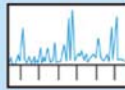

Mass  
spectrometry

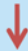

*Urinary AA concentration +  
clinical assessments +  
hematological tests*

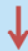

*Screening test for cancer in  
high risk populations*
